# Supplementary material for: Greater exposure to PM 2.5 and PM 10 is associated with a higher BAD score: The Maastricht Study
Source: Research Square preprint supplement (doi:10.21203/rs.3.rs-7452921/v1), 2025-09-18
Supplement: Supplementary file 1 [file 7b082116624b7954e20a8029.docx]

**Supplemental table 1**: P-values for the interaction term of sex with determinants under the study in the associations of Z-scores for PM2.5, PM10, NO2, and soot with final BADD

| Determinant | Number of participants | Final BADD |
| --- | --- | --- |
| P-value (sex x determinant) |
| PM2.5 | 6343 | 0.630 |
| PM10 | 6343 | 0.683 |
| NO2 | 4581 | 0.382 |
| Soot | 6343 | 0.635 |

P-values represent the P-values for the interaction terms of sex with the investigated determinant (e.g., sex × PM2.5) in the associations of air pollutants with BAD. Variables in the model in addition to determinants and interaction term(s) with sex are: age, sex, educational level , glucose metabolism status (prediabetes and type 2 diabetes versus normal glucose metabolism), smoking status (never, former, current), and alcohol consumption status (none, middle, high). In addition, we added an interaction term for all confounders (e.g., age × sex, systolic blood pressure × sex)

**Supplemental table 2**: P-values for the interaction term of glucose metabolism status with determinants under the study in the associations of Z-scores for PM2.5, PM10, NO2, and soot with Z-scores for final BADD

| Determinant | Number of participants | Final BADD-score |
| --- | --- | --- |
|  |  | P-value (Prediabetes vs normal glucose metabolism × determinant) |
| PM2.5 | 6343 | 0.640 |
| PM10 | 6343 | 0.578 |
| NO2 | 4581 | 0.727 |
| Soot | 6343 | 0.781 |
|  |  | P-value (type 2 diabetes vs normal glucose metabolism × determinant) |
| PM2.5 | 6343 | **0.037** |
| PM10 | 6343 | **0.041** |
| NO2 | 4581 | 0.231 |
| Soot | 6343 | 0.091 |

**Supplemental table 3**: Associations of final BADD-score with PM2.5 and PM10, stratified by glucose metabolism status

|  | **Final BADD-score** | | |
| --- | --- | --- | --- |
|  | Number of eyes | Model | Stβ (95% CI) |
| **PM2.5** | | | |
| Normal glucose metabolism | 4167 | 1 | **0.05 (0.03; 0.07)** |
| 2 | **0.04 (0.02; 0.06)** |
| 3 | **0.04 (0.02; 0.06)** |
| Prediabetes | 958 | 1 | 0.04 (-0.02; 0.09) |
| 2 | 0.03 (-0.02; 0.08) |
| 3 | 0.03 (-0.03; 0.08) |
| Type 2 diabetes | 1188 | 1 | 0.00 (-0.05; 0.05) |
| 2 | -0.01 (-0.06; 0.04) |
| 3 | -0.02 (-0.06; 0.03) |
| **PM10** | | | |
| Normal glucose metabolism | 4167 | 1 | **0.05 (0.03; 0.07)** |
| 2 | **0.04 (0.02; 0.06)** |
| 3 | **0.04 (0.02; 0.06)** |
| Prediabetes | 958 | 1 | 0.03 (-0.02; 0.09) |
| 2 | 0.03 (-0.03; 0.08) |
| 3 | 0.03 (-0.03;0.08) |
| Type 2 diabetes | 1188 | 1 | 0.00 (-0.05; 0.05) |
| 2 | -0.01 (-0.06; 0.04) |
| 3 | -0.02 (-0.07; 0.03) |

Variables entered into models:

model 1: crude; model 2: adjusted for age, sex, level of education (low, intermediate, high), glucose metabolism status (prediabetes and type 2 diabetes versus normal glucose metabolism); model 3: model 2 + smoking status (never, former, current), and alcohol consumption status (none, low, high).

Standardized regression coefficients (stβ) represent the difference in final BADD-score for 1 SD greater PM2.5 or PM10, in analyses stratified by glucose metabolism status. For individuals with type 2 diabetes, prediabetes, and normal glucose metabolism, respectively, one SD corresponds with X, X, and X, respectively;

Bold denotes P<0.05.

Abbreviations: stβ, standardized beta; CI, confidence interval; SD, standard deviation
